# Supplementary material for: The Importance of Shiga Toxin-Producing Escherichia coli O145:NM[H28]/H28 Infections in Argentina, 1998–2020
Source: MDPI journal article supplement (doi:10.3390/microorganisms10030582), 2022-03-07
Supplement: s1 [file s1]

# The Importance of Shiga Toxin-Producing *Escherichia coli* O145:NM[H28]/H28 Infections in Argentina, 1998–2020

Claudia Carolina Carbonari <sup>1\*</sup>, Elizabeth Sandra Miliwebsky <sup>1</sup>, Gisela Zolezzi <sup>1</sup>, Natalia Lorena Deza <sup>1</sup>, Nahuel Fittipaldi <sup>4</sup>, Eduardo Manfredi <sup>1</sup>, Ariela Baschkier <sup>1</sup>, Beatriz Alejandra D'Astek <sup>1</sup>, Roberto Gustavo Melano <sup>2,3</sup>, Carla Schesi <sup>1</sup>, Marta Rivas <sup>1</sup> and Isabel Chinen <sup>1</sup>

- <sup>1</sup> Servicio Fisiopatogenia, Departamento Bacteriología, Instituto Nacional de Enfermedades Infecciosas-ANLIS “Dr. Carlos G. Malbrán”, City of Buenos Aires 1282, Argentina; emiliwebsky@anlis.gob.ar (E.S.M.); gzolezzi@anlis.gob.ar (G.Z.); ndeza@anlis.gob.ar (N.L.D.); emanfredi@anlis.gob.ar (E.M.); abaschkier@anlis.gob.ar (A.B.); badastek@gmail.com (B.A.D.); cschesi@anlis.gob.ar (C.S.); mrivas@inmunova.com (M.R.); ichinen@anlis.gob.ar (I.C.)
- <sup>2</sup> Public Health Ontario, Toronto Laboratories, Toronto, Canada; roberto.melano@oahpp.ca (R.G.M.);
- <sup>3</sup> Department of Laboratory Medicine and Pathobiology, University of Toronto, Toronto ON M5G 1M1, Canada
- <sup>4</sup> Faculty of Veterinary Medicine, University of Montreal, Saint-Hyacinthe QC J2S 2M2, Canada; nfittipaldi@umontreal.ca
- \* Correspondence: ccarbonari@anlis.gob.ar

## Supplementary Materials

**Table S1.** Outbreaks description. (†) Deceased case.

| No. of Event | Type of Event                            | Index Case                                                              | Total No. of STEC Case & Contacts Detected                                                                                                                                                                                                                                                                                                                        | City, Province Date                                       | PFGE Patterns of STEC O145 Strains Outbreak Associated                                                                                                                                                                                                            |
|--------------|------------------------------------------|-------------------------------------------------------------------------|-------------------------------------------------------------------------------------------------------------------------------------------------------------------------------------------------------------------------------------------------------------------------------------------------------------------------------------------------------------------|-----------------------------------------------------------|-------------------------------------------------------------------------------------------------------------------------------------------------------------------------------------------------------------------------------------------------------------------|
| 1            | Institutional / day-care center outbreak | HUS case<br>1 year old boy<br>Co-infection<br>STEC shedding for 18 days | 1 HUS case with long shedding. (Four strains STEC O145:NM[H28] <i>stx2a/eae/ehxA</i> and one STEC O145:H7) (ONT:HNT)<br>1 HUS case and 1 asymptomatic case (O145:NM <i>stx2a/eae/ehxA</i> )                                                                                                                                                                       | Rosario, Santa Fe<br>January, 2005                        | ARENMX01.0006 (2 HUS cases one present 2 strains) and ARENMX01.0043 (asymptomatic) with 88.9% similarity. ARENMX01.0042 (2 strains from excretion) with 74% similarity.                                                                                           |
| 2            | Family outbreak                          | Undetermined                                                            | 3 HUS cases<br>1 asymptomatic contact (O145:NM[H28] <i>stx2a/eae/ehxA</i> )                                                                                                                                                                                                                                                                                       | Mar del Plata, Buenos Aires<br>January and February, 2006 | ARENMX01.0061 - 100% similarity                                                                                                                                                                                                                                   |
| 3            | Family outbreak                          | HUS case<br>20 months of age                                            | 1 HUS case (STEC negative) and 3 asymptomatic household contacts (2 sisters and the father) (O145:NM[H28], <i>stx2a/eae/ehxA</i> )                                                                                                                                                                                                                                | Neuquén, Neuquén<br>November, 2006                        | ARENMX01.0006 - 100% similarity                                                                                                                                                                                                                                   |
| 4            | Family outbreak                          | HUS case                                                                | 1 HUS case and 1 asymptomatic contact (sister) (O145:NM[H28] <i>stx2a/eae/ehxA</i> )                                                                                                                                                                                                                                                                              | Córdoba, Córdoba<br>January 2011                          | ARENMX01.0040 - 100% similarity                                                                                                                                                                                                                                   |
| 5            | Institutional / kindergarten outbreak    | HUS case (†)<br>5 years old boy                                         | 1 HUS case (+), 1 BD case (3 positive samples) and 2 D non-complicated (one D with 3 positive samples) (O145:NM[H28], <i>stx2a/eae/ehxA</i> )<br>1 contact (O111:NM, <i>stx1a/eae/ehxA</i> )                                                                                                                                                                      | City of Buenos Aires<br>April, 2011                       | ARENMX01.0135 (HUS) ARENMX01.0136 (BD 1 <sup>st</sup> sample and D – 100% similarity) ARENMX01.0137 (D 1 <sup>st</sup> , 2 <sup>nd</sup> and 3 <sup>rd</sup> sample; BD 2 <sup>nd</sup> and 3 <sup>rd</sup> sample – 100%) 84.6% similarity among all the strains |
| 6            | Institutional / kindergarten outbreak    | HUS case<br>Co-infection<br>10 months old girl                          | 1 HUS (two positive samples) and 1 D case (O145:NM[28], <i>stx2a/eae/ehxA</i> and O157:H7, <i>stx2a/stx2c/eae/ehxA</i> )<br>1 BD case (O157:H7, <i>stx2a/stx2c eae/ehxA</i> )<br>1 Contact (O26:H11, <i>stx1a/eae/ehxA</i> and O157:H7, <i>stx2a/stx2c/ eae/ehxA</i> )<br>1 D case (O91:H21, <i>stx2c/ehxA</i> )<br>1 Contact (O103:NM, <i>stx1a, /eae/ehxA</i> ) | City of Buenos Aires<br>May, 2011                         | ARENMX01.0138 (HUS 1 <sup>st</sup> and D – 100% similarity) ARENMX01.0139 93.3% similarity among all the strains                                                                                                                                                  |

| 1 Contact (O22:H11, <i>stx</i> <sub>1a</sub> / <i>stx</i> <sub>2c</sub> / <i>ehx</i> A) |                                             |                                                                  |                                                                                                                                              |                                                      |                                                                                                                                                                                                      |
|-----------------------------------------------------------------------------------------|---------------------------------------------|------------------------------------------------------------------|----------------------------------------------------------------------------------------------------------------------------------------------|------------------------------------------------------|------------------------------------------------------------------------------------------------------------------------------------------------------------------------------------------------------|
| 7                                                                                       | Family outbreak                             | HUS case<br>23 months old girl                                   | 1 HUS case and 2 contacts (father and sister)<br>(O145:NM[H28], <i>stx</i> <sub>2a</sub> / <i>eae</i> / <i>ehx</i> A)                        | City of Buenos Aires<br>December, 2011               | ARENMX01.0119 - 100% similarity                                                                                                                                                                      |
| 8                                                                                       | Family outbreak                             | DS case<br>8 years old boy                                       | 1 BD case and 1 contact (sister)<br>(O145:NM[28], <i>stx</i> <sub>2a</sub> / <i>eae</i> / <i>ehx</i> A)                                      | Tandil, Buenos Aires<br>December, 2011               | ARENMX01.0169 - 100% similarity                                                                                                                                                                      |
| 9                                                                                       | Institutional /<br>Day-care center outbreak | HUS case<br>2 years old girl                                     | 1 HUS and 2 asymptomatic contacts<br>(O145:NM[28], <i>stx</i> <sub>2a</sub> / <i>eae</i> / <i>ehx</i> A)                                     | San Carlos de Bariloche, Río Negro<br>October, 2012  | ARENMX01.0194 (HUS and contact – 100% similarity)<br>ARENMX01.0212 (contact - 90.5% similarity)                                                                                                      |
| 10                                                                                      | Family outbreak                             | HUS case                                                         | 1 HUS and 1 asymptomatic contact (brother)<br>(O145:NM[28], <i>stx</i> <sub>2a</sub> / <i>eae</i> / <i>ehx</i> A)                            | City of Buenos Aires<br>January 2015                 | ARENMX01.0207 – 100% similarity                                                                                                                                                                      |
| 11                                                                                      | Family outbreak                             | HUS case<br>17 months old                                        | 1 HUS case (STEC negative) and 1 asymptomatic contact (sister)<br>(O145:NM[28], <i>stx</i> <sub>2a</sub> / <i>eae</i> / <i>ehx</i> A)        | Villarino, Buenos Aires<br>January 2016              | ARENMX01.0274 (contact)                                                                                                                                                                              |
| 12                                                                                      | Family outbreak                             | HUS case<br>8 months old boy                                     | 1 HUS case (STEC negative) and 1 asymptomatic contact (mother)<br>(O145:NM[28], <i>stx</i> <sub>2a</sub> / <i>eae</i> / <i>ehx</i> A)        | San Carlos de Bariloche, Río Negro<br>February, 2016 | ARENMX01.0261 - 100% similarity                                                                                                                                                                      |
| 13                                                                                      | Family outbreak                             | BD case<br>8 years old boy                                       | 1 BD case and 3 asymptomatic contacts (2 sisters and 1 brother) (O145:NM[28], <i>stx</i> <sub>2a</sub> / <i>eae</i> / <i>ehx</i> A)          | Maisonave, La Pampa<br>August, 2016                  | ARENMX01.0120 (BD 1 <sup>st</sup> , 2 <sup>nd</sup> and 4 <sup>th</sup> – 100% similarity) and<br>ARENMX01.0279 (contacts) with 92.4% similarity                                                     |
| 14                                                                                      | Family outbreak                             | D case<br>1 year old boy                                         | 1 D case and 6 contacts with diarrhea (4 brothers, 2 sisters) (O145:NM[28], <i>stx</i> <sub>2a</sub> / <i>eae</i> / <i>ehx</i> A)            | Gral. Pico, La Pampa<br>December, 2016               | ARENMX01.0281 - 100% similarity                                                                                                                                                                      |
| 15                                                                                      | Institutional /<br>Kindergarten outbreak    | HUS case<br>5 years old girl                                     | 3 HUS cases (two are brother and sister)<br>(O145:NM[28], <i>stx</i> <sub>2a</sub> / <i>eae</i> / <i>ehx</i> A)                              | Vicente López, Buenos Aires<br>July, 2017            | ARENMX01.0303 – 100% similarity                                                                                                                                                                      |
| 16                                                                                      | Family outbreak                             | D case<br>3 years old boy                                        | 1 D case and 2 asymptomatic contacts (mother and unknown) (O145:NM[28], <i>stx</i> <sub>2a</sub> / <i>eae</i> / <i>ehx</i> A)                | San Justo, Buenos Aires<br>February, 2018            | ARENMX01.0120 (D 1 <sup>st</sup> , 2 <sup>nd</sup> and contacts – 100% similarity)                                                                                                                   |
| 17                                                                                      | Family outbreak                             | HUS case<br>20 months old boy                                    | 1 HUS case and 2 asymptomatic contacts (sister and mother) (O145:NM[28], <i>stx</i> <sub>2a</sub> / <i>eae</i> / <i>ehx</i> A)               | Hilario Lagos, La Pampa<br>March, 2018               | ARENMX01.0319 (HUS 1 <sup>st</sup> , 2 <sup>nd</sup> , 3 <sup>th</sup> and contacts – 100% similarity)                                                                                               |
| 18                                                                                      | Family outbreak                             | HUS case<br>6 months old boy                                     | 1 HUS and 1 asymptomatic contact (father)<br>(O145:NM[28], <i>stx</i> <sub>2a</sub> / <i>eae</i> / <i>ehx</i> A)                             | Bahía Blanca, Buenos Aires<br>November 2018          | ARENMX01.0340 – 100% similarity                                                                                                                                                                      |
| 19                                                                                      | Family outbreak                             | HUS case<br>2 years old                                          | 1 HUS (STEC negative) and 1 asymptomatic contact (mother) (O145:NM[28], <i>stx</i> <sub>2a</sub> / <i>eae</i> / <i>ehx</i> A)                | Valcheta, Río Negro<br>May 2018                      | ARENMX01.0324                                                                                                                                                                                        |
| 20                                                                                      | Family outbreak                             | HUS case<br>2 years old                                          | 1 HUS (STEC negative) and 2 asymptomatic contacts (sister and mother)<br>(O145:NM[28], <i>stx</i> <sub>2a</sub> / <i>eae</i> / <i>ehx</i> A) | Bahía Blanca, Buenos Aires<br>March 2019             | ARENMX01.0076 – 100% similarity                                                                                                                                                                      |
| 21                                                                                      | Family outbreak                             | D case<br>12 years old boy<br>Long shedding (5 positive samples) | 1 D case and 1 asymptomatic contact (father)<br>(O145:NM[28], <i>stx</i> <sub>2a</sub> / <i>eae</i> / <i>ehx</i> A)                          | San Carlos de Bariloche, Río Negro<br>June 2019      | ARENMX01.0399 (2 <sup>nd</sup> )<br>ARENMX01.0401 (3 <sup>th</sup> )<br>ARENMX01.0402 (4 <sup>th</sup> , 5 <sup>th</sup> and 6 <sup>th</sup> sample) with 94.3% similarity<br>(Contact non-typeable) |
| 22                                                                                      | Family outbreak                             | D case<br>2 years old girl                                       | 2 D case (index case and sister)<br>(O145:NM[28], <i>stx</i> <sub>2a</sub> / <i>eae</i> / <i>ehx</i> A)                                      | Realicó, La Pampa<br>November 2020                   | ARENMX01.0400 (HUS 1 <sup>st</sup> , 2 <sup>nd</sup> and contact – 100% similarity)                                                                                                                  |
